# Supplementary material for: Lead molybdate – a promising material for optoelectronics and photocatalysis
Source: Royal Society of Chemistry journal article supplement (doi:10.1039/c4tc02750g), 2015-01-01
Supplement: c4tc02750g1.pdf [file c4tc02750g1.pdf]

Lead molybdate – a promising material for optoelectronics and photocatalysis

ELECTRONIC SUPPLEMENTARY INFORMATION

Przemysław Kwolek<sup>a,b</sup>, Kacper Pilarczyk<sup>c</sup>, Tomasz Tokarski<sup>b</sup>, Marta Łapczyńska<sup>d</sup>,  
Michał Pacia<sup>e</sup> and Konrad Szaciłowski<sup>b,e,\*</sup>

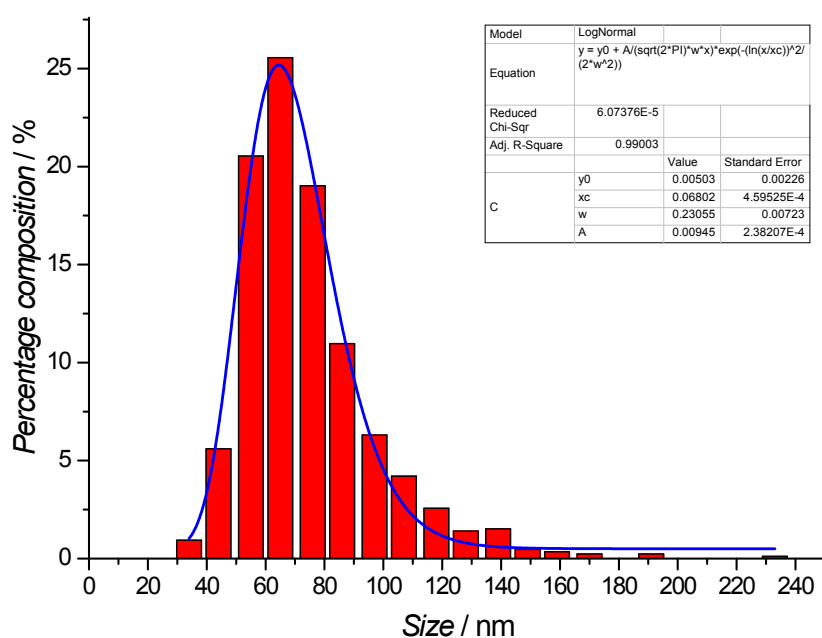

Fig. S1. Grain size distribution of PbMoO<sub>4</sub>, sample 1a.

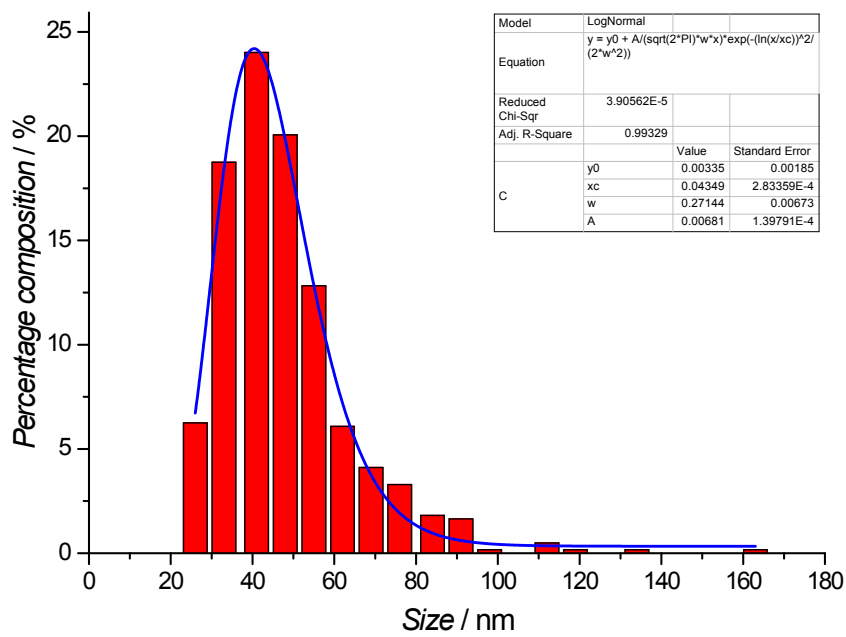

Fig. S2. Grain size distribution of PbMoO<sub>4</sub>, sample **1b**.

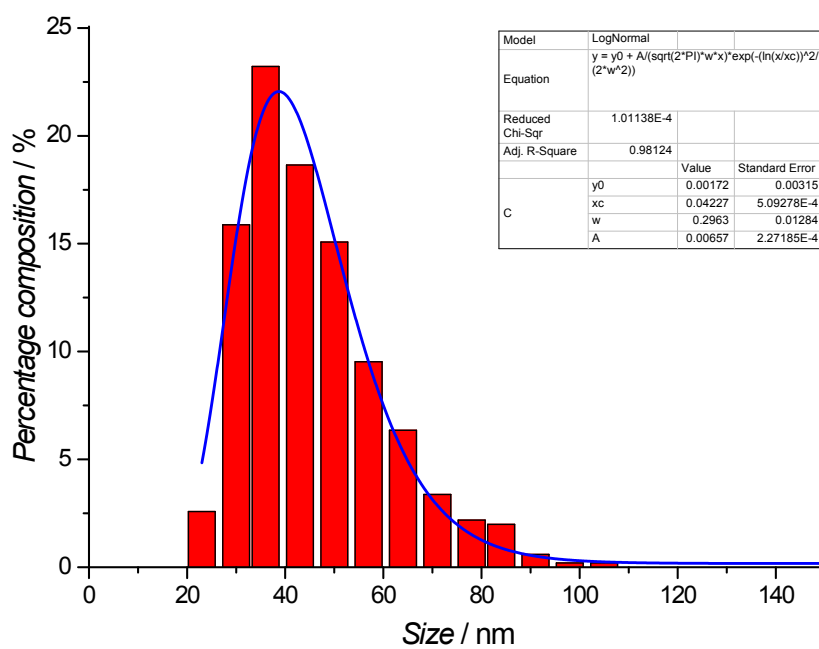

Fig. S3. Grain size distribution of PbMoO<sub>4</sub>, sample 1c.

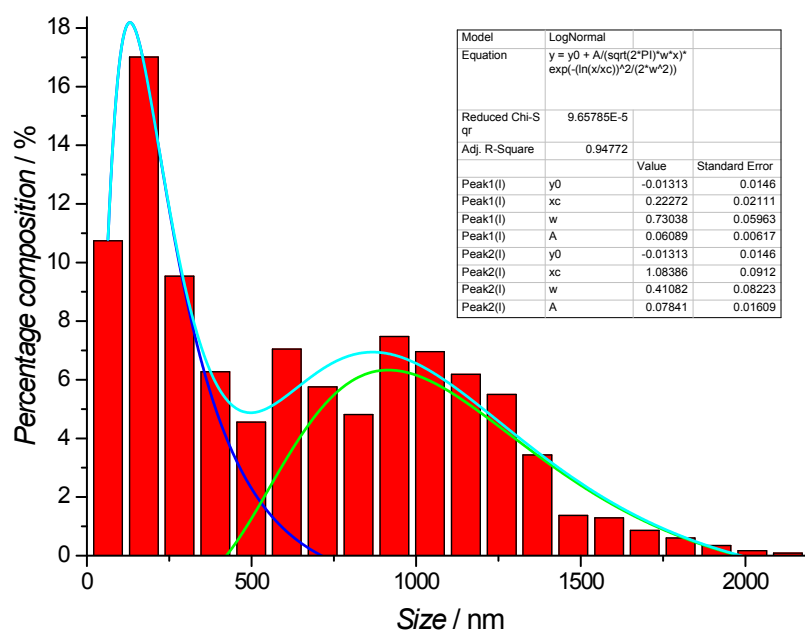

Fig. S4. Grain size distribution of PbMoO<sub>4</sub>, sample **2a**.

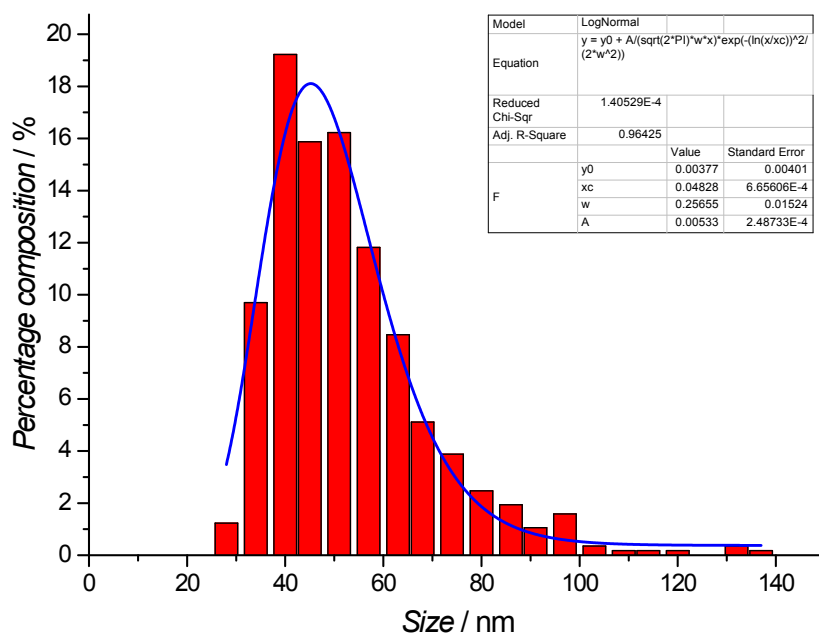

Fig. S5. Grain size distribution of PbMoO<sub>4</sub>, sample **2b**.

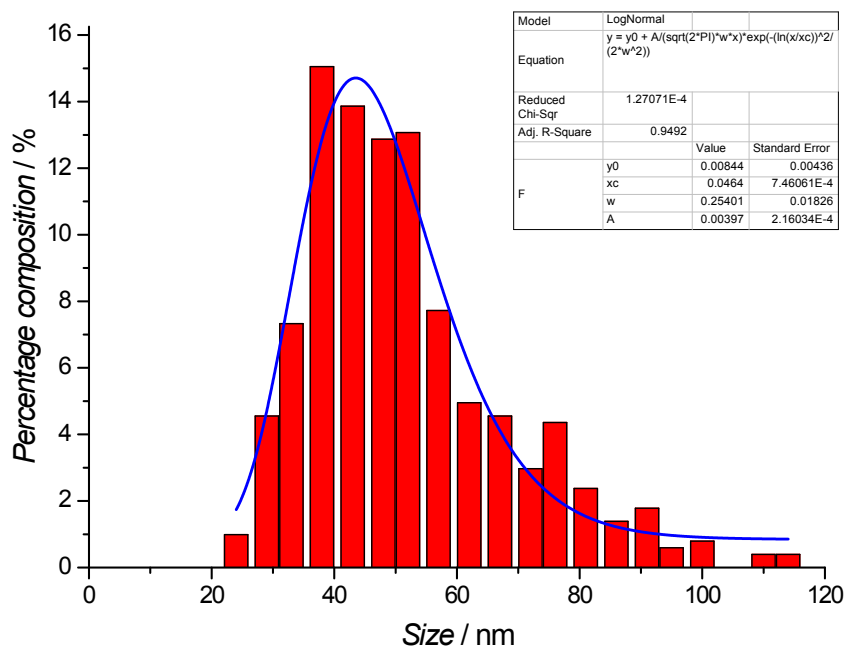

Fig. S6. Grain size distribution of PbMoO<sub>4</sub>, sample **2c**.

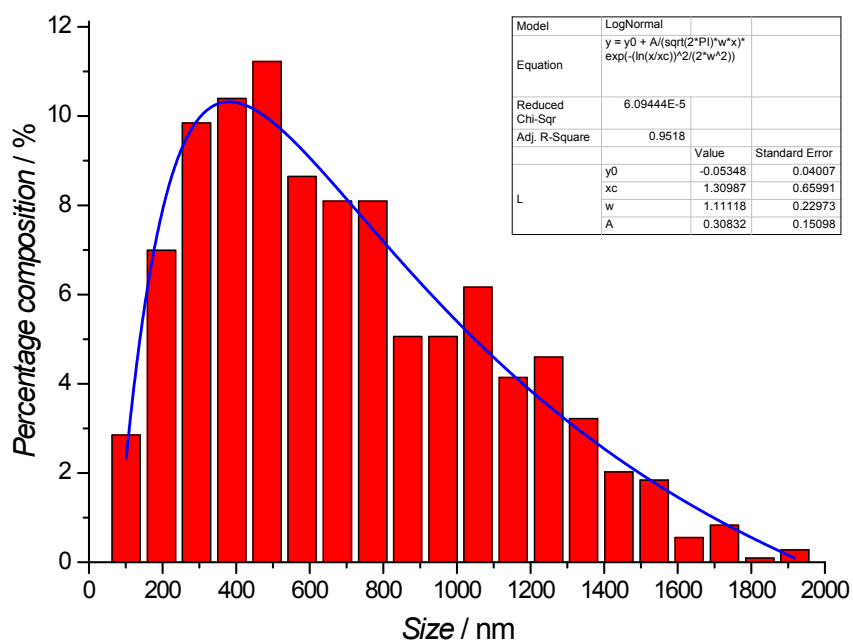

Fig. S7. Grain size distribution of PbMoO<sub>4</sub>, sample **3a**.

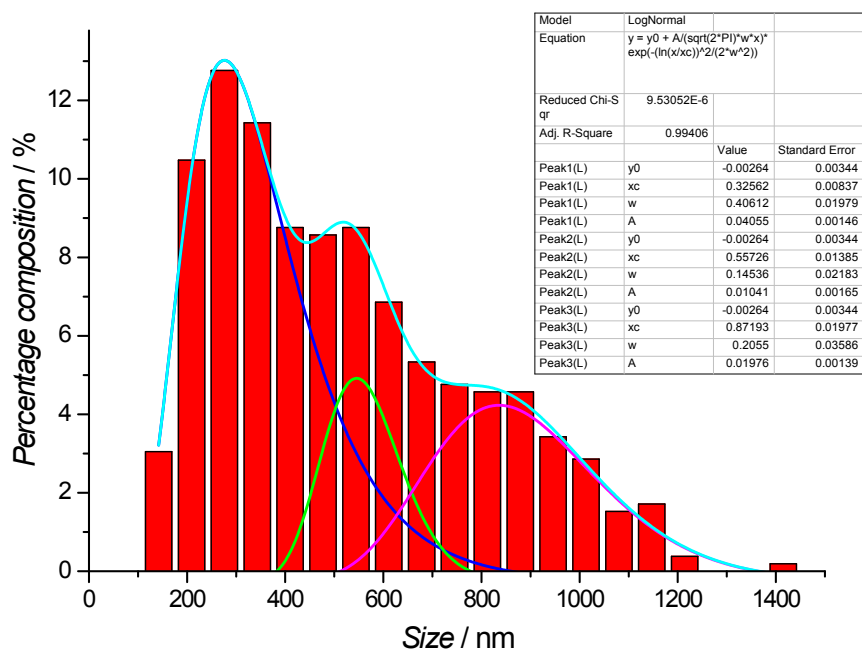

Fig. S8. Grain size distribution of PbMoO<sub>4</sub>, sample **3b**.



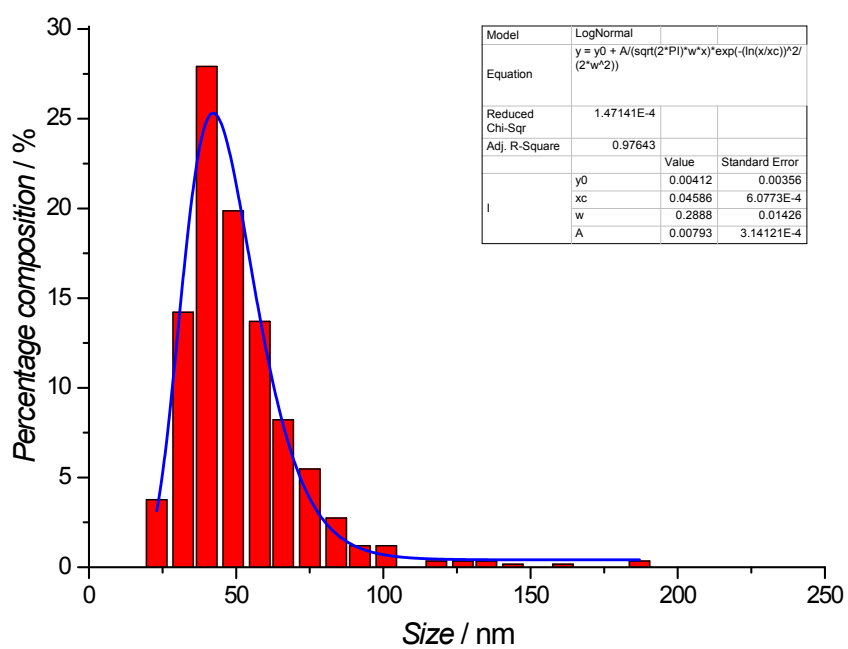

Fig. S9. Grain size distribution of PbMoO<sub>4</sub>, sample 3c.

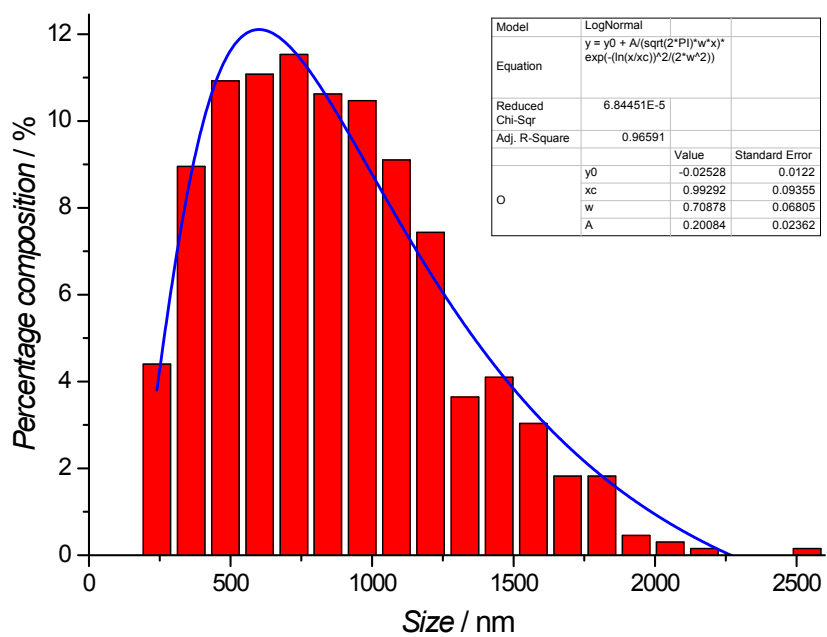

Fig. S10. Grain size distribution of PbMoO<sub>4</sub>, sample **4a**.

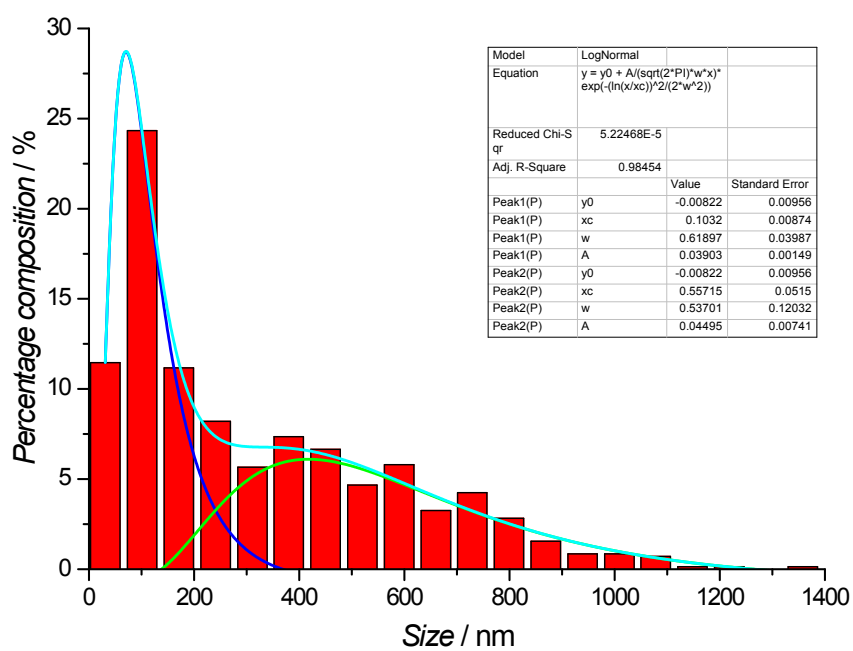

Fig. S11. Grain size distribution of PbMoO<sub>4</sub>, sample **4b**.

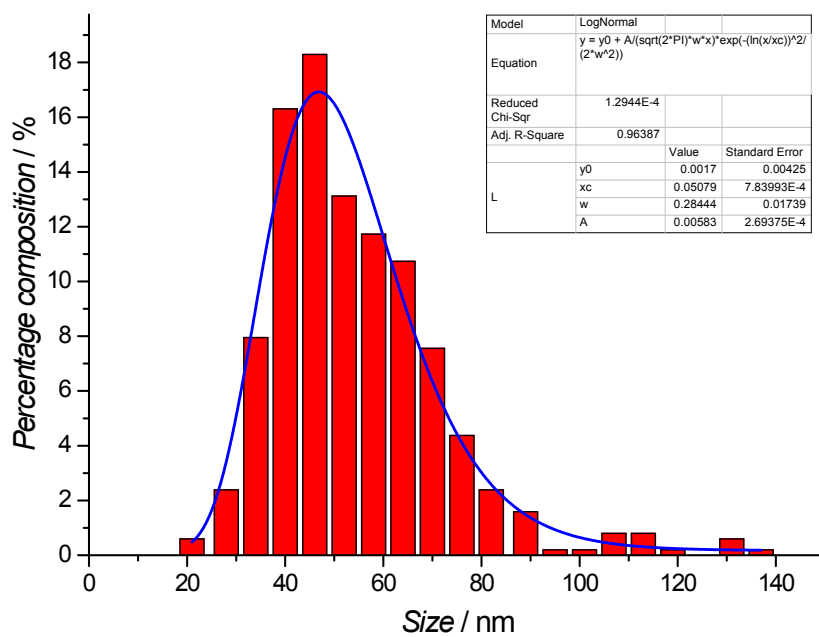

Fig. S12. Grain size distribution of PbMoO<sub>4</sub>, sample **4c**.
